# Supplementary material for: Bioinstructive polymer fibre mats to reduce bacterial pathogen colonisation
Source: Royal Society of Chemistry journal article supplement (doi:10.1039/d5lp00220f), 2025-11-17
Supplement: d5lp00220f1.pdf [file d5lp00220f1.pdf]

## SUPPLEMENTARY INFORMATION

### Bioinstructive Polymer Fibre Mats to Reduce Bacterial Pathogen Colonisation

Joseph Sefton<sup>a†</sup>, Michael P. Avery<sup>b†</sup>, Jean-Frédéric Dubern<sup>c</sup>, Mohammad Ghasemzadeh-Hasankolaei<sup>d</sup>, Rahul Tiwari<sup>d</sup>, Amir M Ghaemmaghami<sup>d</sup>, Morgan R. Alexander<sup>f</sup>, Paul Williams<sup>c</sup>, Derek J. Irvine<sup>a,g</sup>, Jonny J. Blaker<sup>b,h</sup>, Adam A. Dundas<sup>a\*</sup>

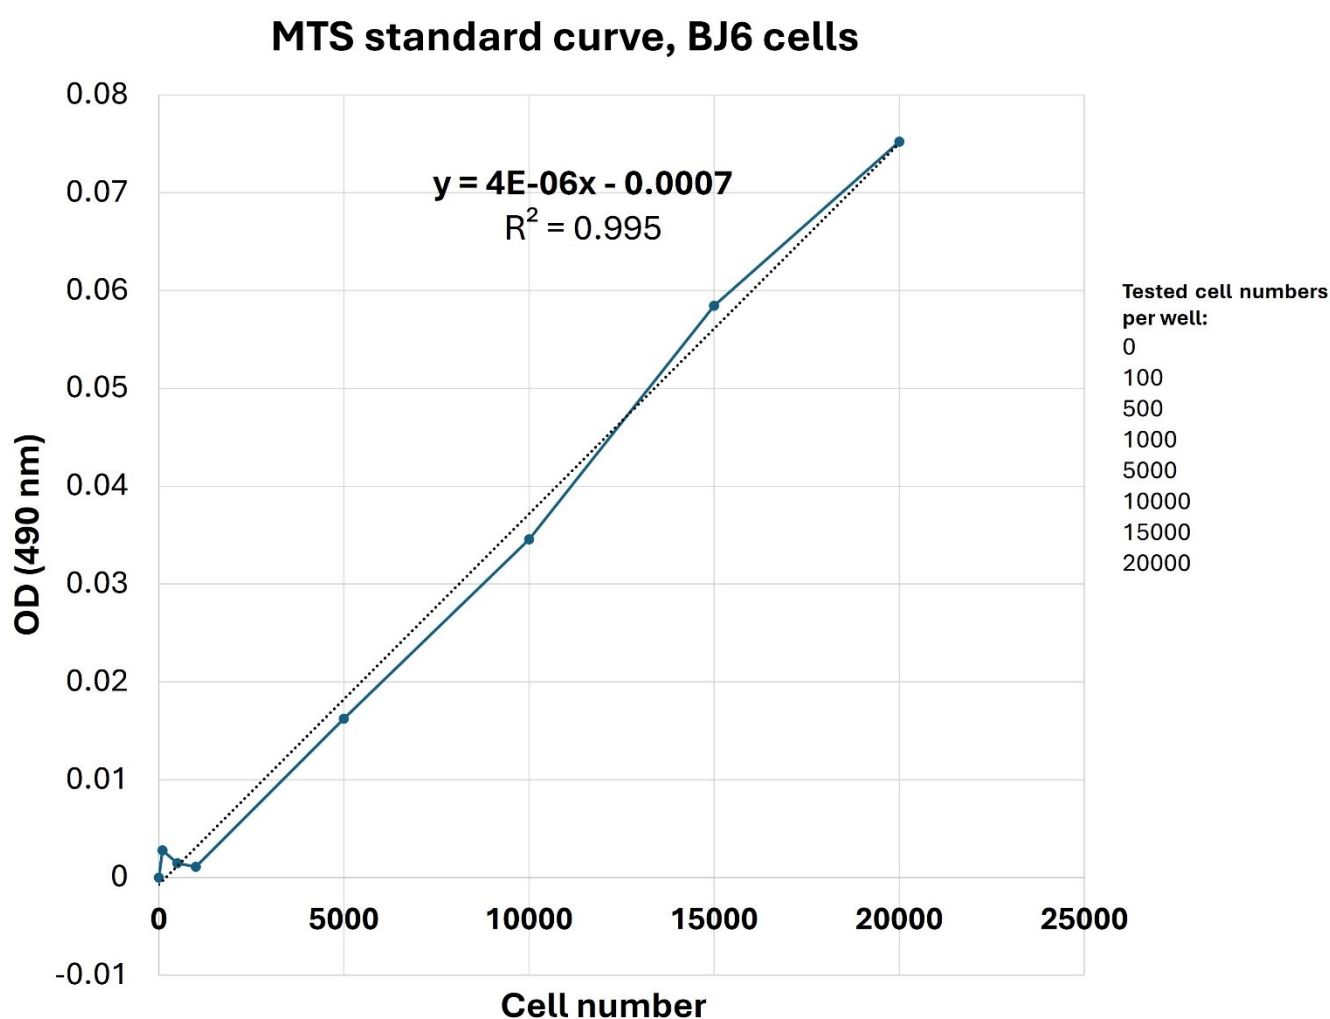

Figure S1: Standard curve for the MTS proliferation assay. Passage 7 cells seeded at 0, 100, 500, 1000, 5000, 10000, 15000 and 20000 cells per well in a 24 well plate. MTS reagent was added, and the optical density of aliquots were measured at 490 nm and the average used to plot the standard curve

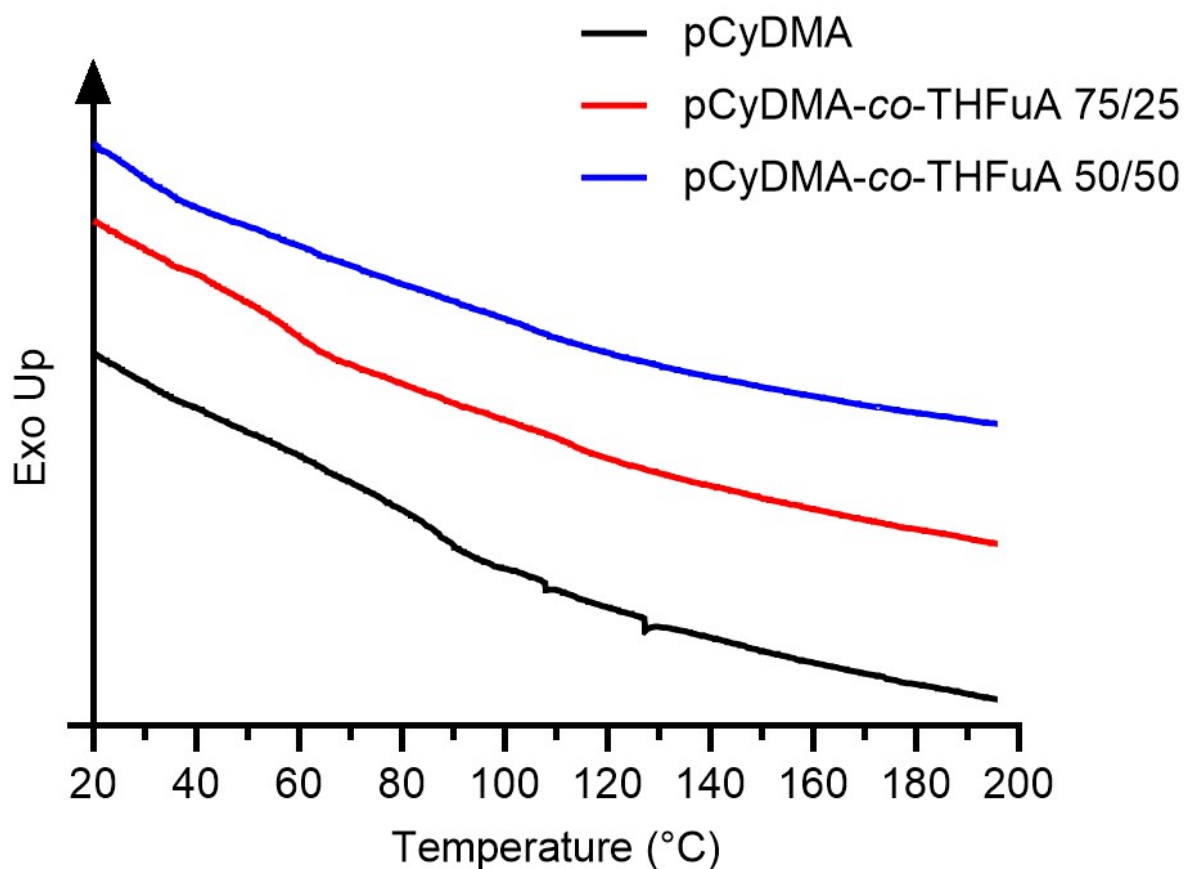

Figure S2: Differential scanning calorimetry results for pCyDMA, pCyDMA-co-THFuA 75/25 and pCyDMA-co-THFuA 50/50.

<sup>a</sup> Department of Chemical and Environmental Engineering, Faculty of Engineering, University of Nottingham, Nottingham, NG7 2RD, UK

<sup>b</sup> Henry Royce Institute, The University of Manchester, Manchester, M13 9PL, UK

<sup>c</sup> National Biofilms Innovation Centre, Biodiscovery Institute and School of Life Sciences, University of Nottingham, Nottingham, NG7 2RD, UK

<sup>d</sup> School of Life Sciences, University of Nottingham, Nottingham, NG7 2RD, UK

<sup>e</sup> Camstent Ltd, The Exchange, Colworth Science Park, Bedford, MK44 1LZ

<sup>f</sup> Advanced Materials & Healthcare Technologies, School of Pharmacy, University of Nottingham, Nottingham, NG7 2RD, UK

<sup>g</sup> Centre for Additive Manufacturing, The University of Nottingham, Nottingham, NG7 2RD

<sup>h</sup> Department of Materials, The University of Manchester, Manchester, M13 9PL, UK

† These authors contributed equally to the manuscript.

E-mail: adam.dundas1@nottingham.ac.uk

Supplementary Information available: [details of any supplementary information available should be included here]. See DOI: 10.1039/x0xx00000x

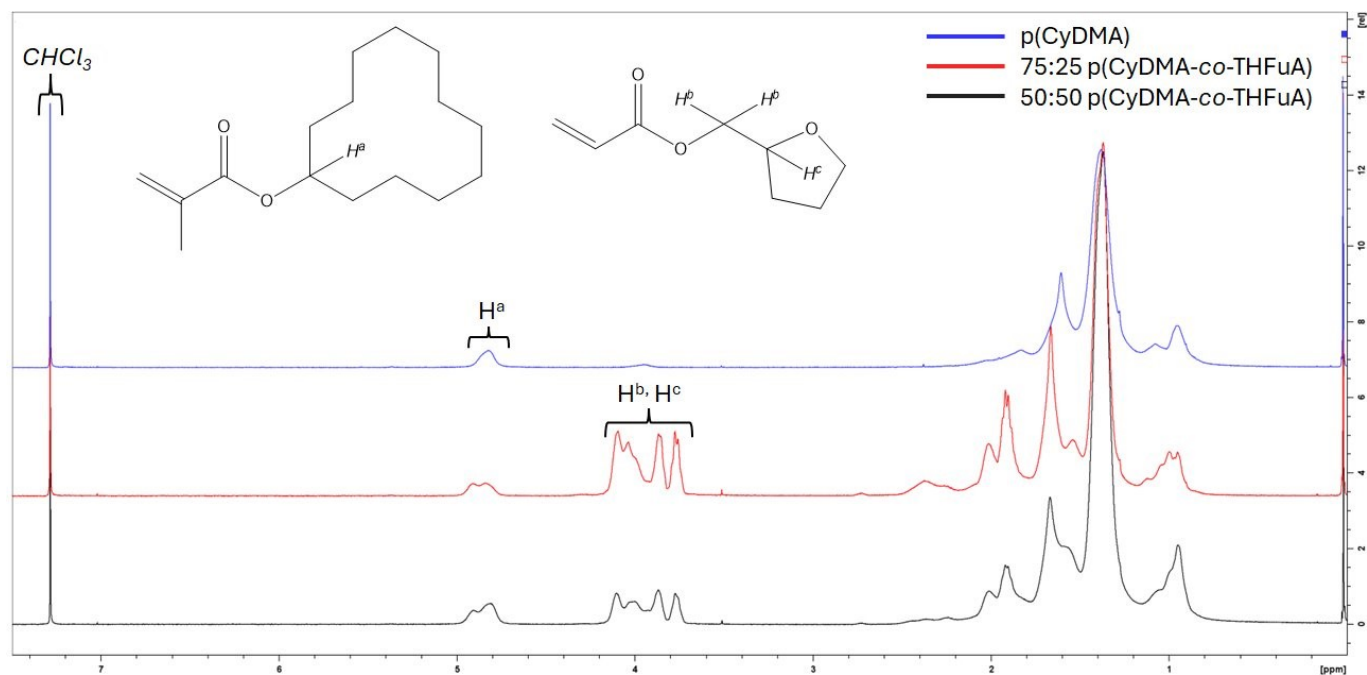

Figure S3: Stacked  $^1\text{H}$  NMR spectra for p(CyDMA), 75:25 and 50:50 p(CyDMA-co-THFuA) showing the characteristic resonances of CyDMA and THFuA that were used for analysis

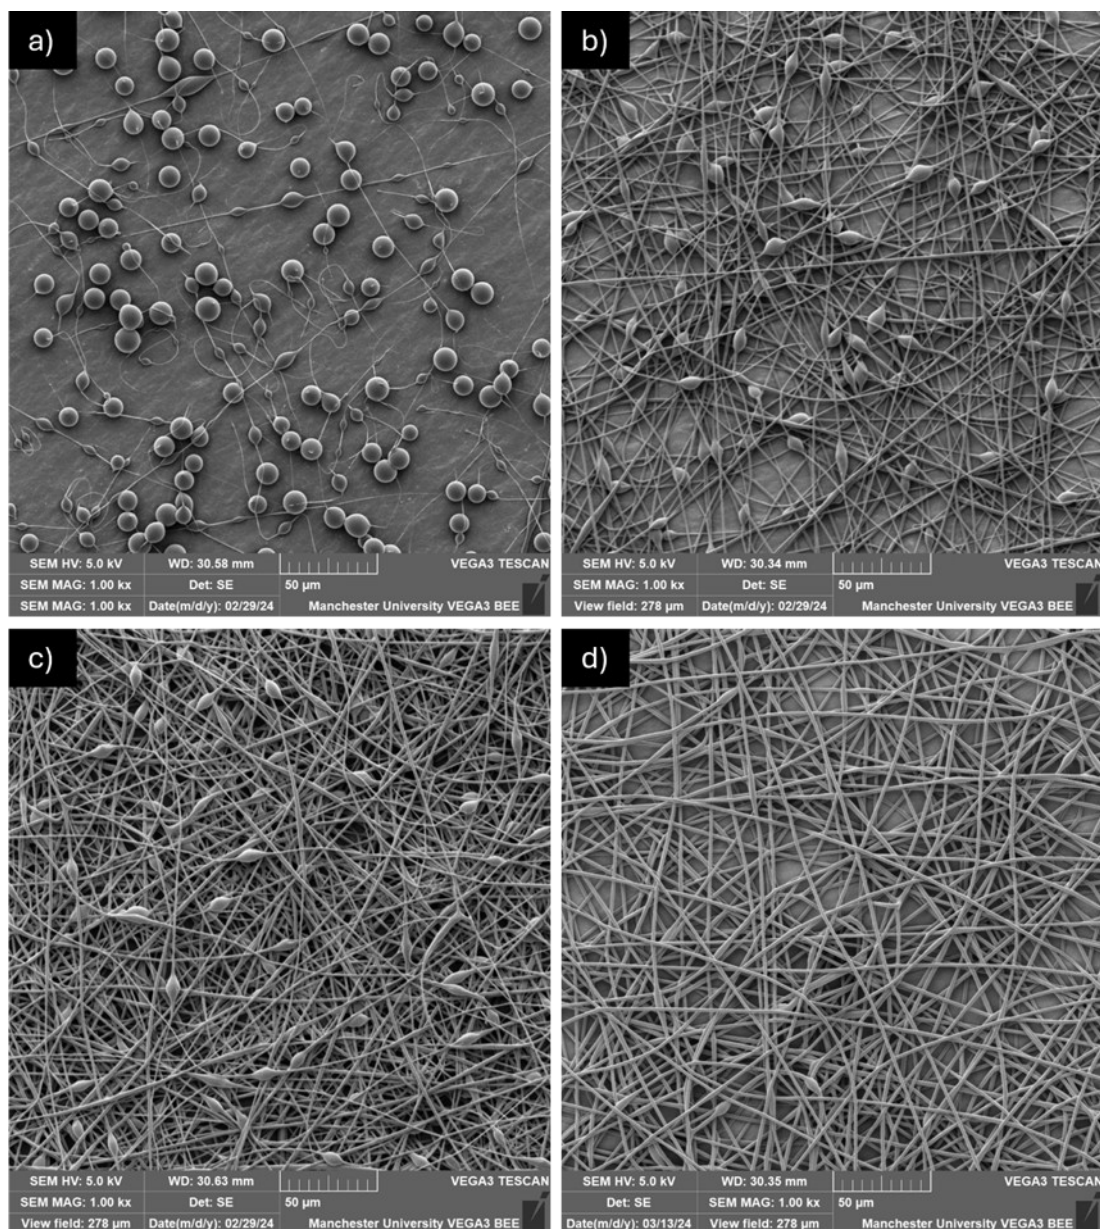

Figure S4: Scanning electron micrographs showing improvement in fibre formation from a 20% w/v solution of pCyDMA-co-THFuA (50:50) in a) DCM, b) 6.5 :1 DCM:EtOH, c) 4:1 DCM:EtOH, and d) 2:1 DCM:EtOH. All electrospinning experiments were performed with a  $-20$  kV emitter voltage and a  $+1$  kV collector voltage, solution flow rate of  $3.5 \text{ ml h}^{-1}$  with a working distance of  $240 \text{ mm}$ . All images are taken at  $1000\times$  magnification and scale bars represent  $50 \text{ }\mu\text{m}$ .

Table S1: Average fibre diameter of pCyDMA-co-THFuA 50:50 spun under the same conditions from varying DCM:EtOH solvent mixes as determined from the micrographs in Figure S3. Data from 100 fibres in a single image. For fibre measurements, bead diameters were not considered

| DCM:EtOH | Average Fibre Diameter ( $\mu\text{m}$ ) | Standard Deviation ( $\mu\text{m}$ ) |
|----------|------------------------------------------|--------------------------------------|
| 1:0      | N/A                                      | N/A                                  |
| 6.5:1    | 1.28                                     | 0.35                                 |
| 4:1      | 1.36                                     | 0.36                                 |
| 2:1      | 1.88                                     | 0.24                                 |

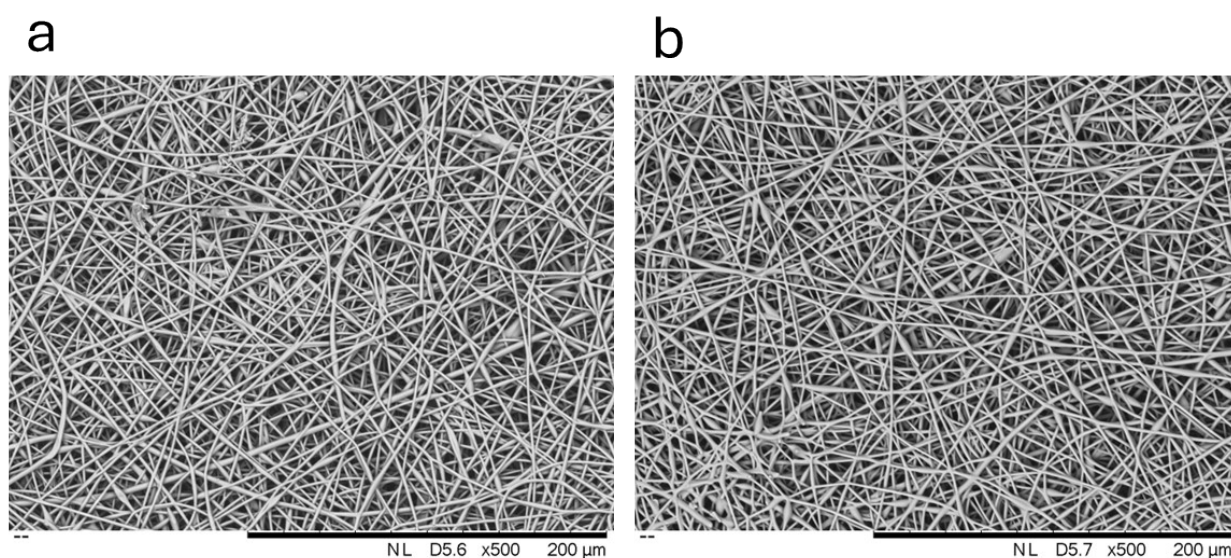

Figure S5: SEM images showing bio-instructive CyDMA-co-THFuA (50:50) polymer fibres (a) before gamma sterilisation and (b) after gamma sterilisation with a dose between 28.00 and 32.89 kGy.

a

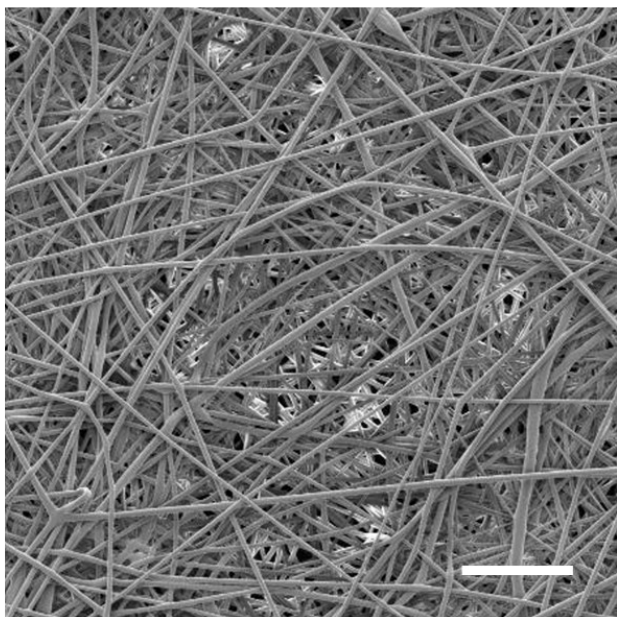

b

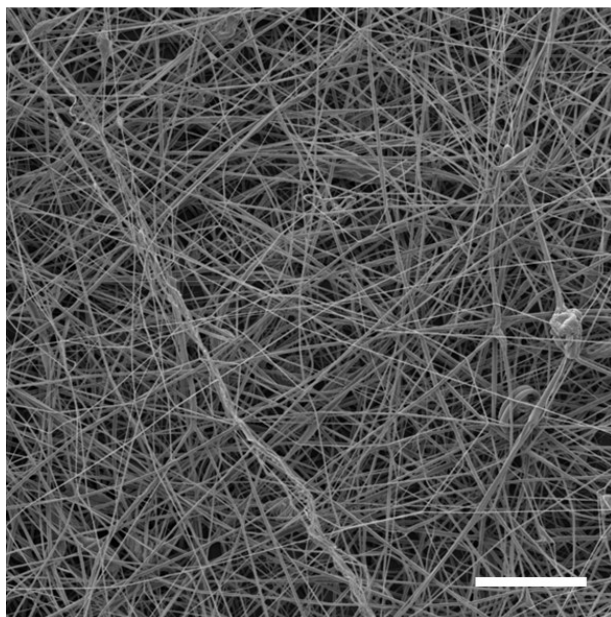

Figure S6: SEM images showing bio-instructive fibres used in biological studies (a) CyDMA-co-THFuA (50:50)  $2.28 \pm 0.65 \mu\text{m}$  (b) PLA fibres  $1.20 \pm 0.39 \mu\text{m}$ . Measurements were taken from  $N = 400$  fibres. Scale bar represents  $50 \mu\text{m}$ .
